# Supplementary material for: Advanced H2-storage system fabricated through chemical layer deposition in a well-designed porous carbon scaffold
Source: Royal Society of Chemistry journal article supplement (doi:10.1039/c4ta02917h), 2014-01-01
Supplement: c4ta02917h1.pdf [file c4ta02917h1.pdf]

**Supporting Information**

**Advanced H<sub>2</sub>-Storage System Fabricated via Chemical Layer Deposition in a Well-Designed Porous Material Template**

*Yanhui Guo<sup>a</sup>, Minghong Wang<sup>b</sup>, Guanglin Xia<sup>a</sup>, Xiaohua Ma<sup>a,c</sup>, Fang Fang<sup>\*a</sup>,*

*Yonghui Deng<sup>\*b</sup>*

<sup>a</sup> Department of Materials Science, Fudan University, Shanghai, 200433 China

<sup>b</sup> Department of Chemistry, State key Laboratory of Molecular Engineering of Polymers, Fudan University, Shanghai, 200433 China

<sup>c</sup> Center of Special Materials and Technology, Fudan University, Shanghai, 200433 China

Correspondence and requests for materials should be addressed to F. Fang, and Y. H. Deng.  
email: f\_fang@fudan.edu.cn, yhdeng@fudan.edu.cn.

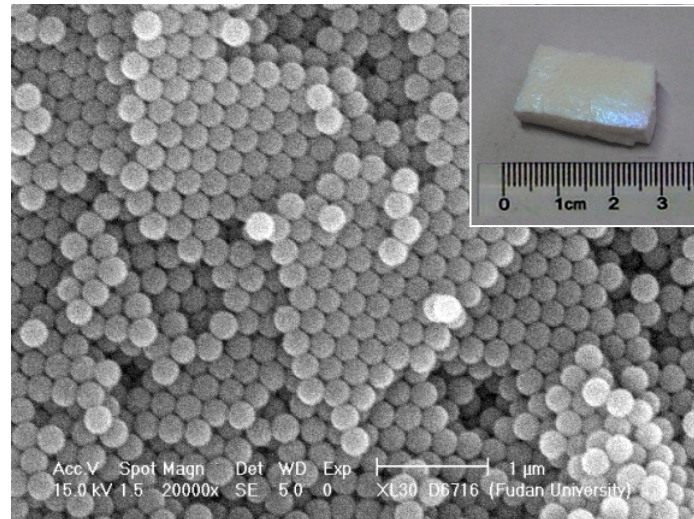

**Figure S1** SEM image of colloidal crystals consisting of uniform silica spheres of 250 nm. The inset shows the photograph of a piece of colloidal silica crystals

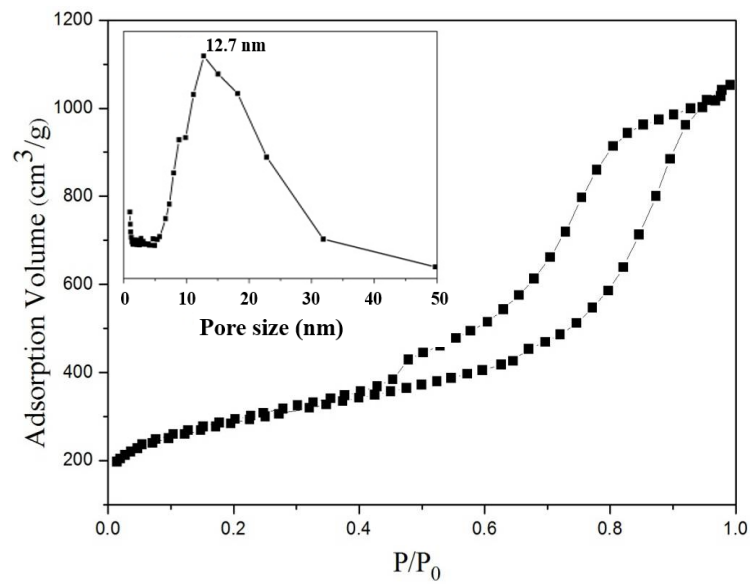

**Figure S2** N<sub>2</sub> sorption isotherms and pore size distributions of the hierarchically macro-mesoporous carbon with macropore of 250 nm and mesopore of 12.7 nm.

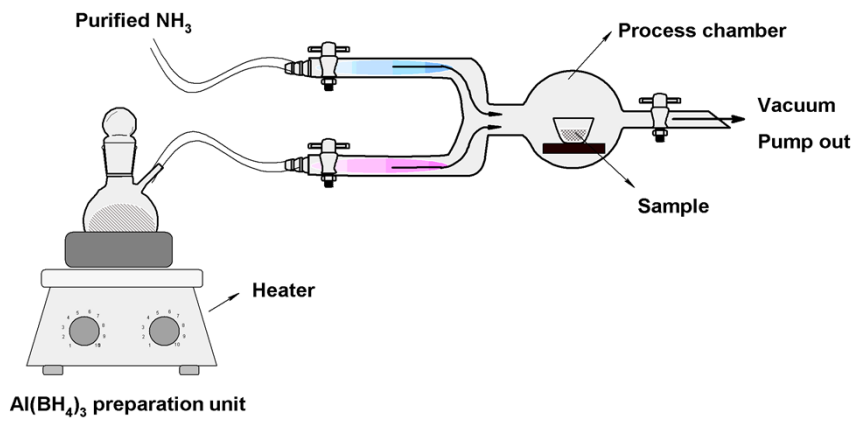

**Figure S3.** Schematic representation of the procedure for the deposition of ammine aluminum borohydrides (AAB) in ce-confined into carbon scaffolds via the CLD methodology.

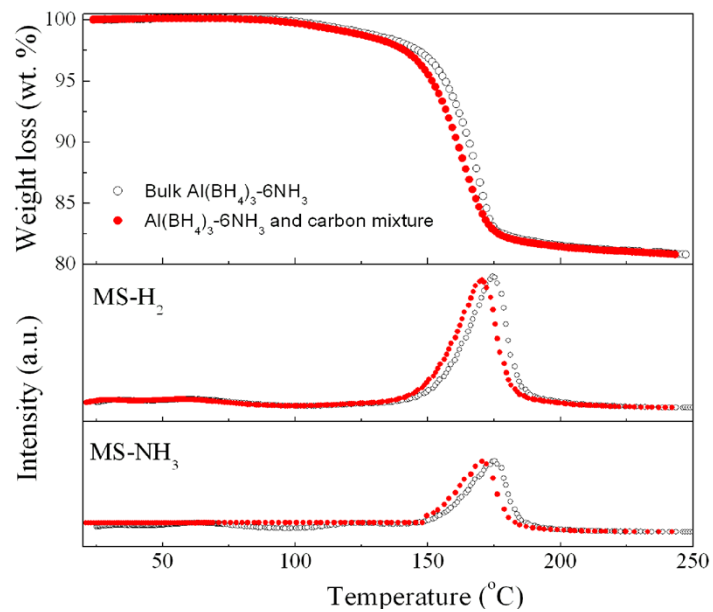

**Figure S4** TGA-MS spectra of the pure  $\text{Al}(\text{BH}_4)_3(\text{NH}_3)_6$  (in black line) and the physical mixture of  $\text{Al}(\text{BH}_4)_3(\text{NH}_3)_6$  with HOPC (in red line).

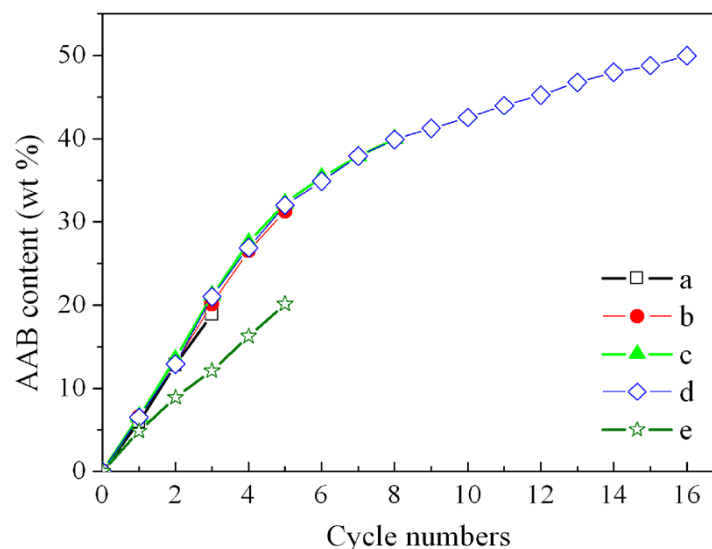

**Figure S5.** The increment of uploading capacity with the proceeding of reaction cycles for various carbon templates under different conditions; a: C-20; b: C-30; c: C-40 d: C-50 with the time of 2 h for ammonia physisorption and then the time of 0.5 h for vacuuming to remove residual ammonia during the first cycle; e: C-20; with the absorption time of ammonia for 2 h and then the time of 0.8 h for vacuuming to remove residual ammonia during the first cycle.

It clearly indicates that, with the proceeding of reaction cycles, the kinetics of the increment of loading capacity decreases, which can be attributed to the fact that upon the uploading of ammine aluminum borohydrides, the entrance become fewer and smaller, which hinders the transmission of precursors into the pore. Moreover, via adjusting the capacity of  $\text{NH}_3$  adsorbed inside the templates during the first cycle, i.e., increasing the time of removing  $\text{NH}_3$  from 0.5 h to 0.8 h, the weight gain for every cycle decreased for the same carbon scaffolds with a diameter of 250 nm. Therefore, the morphology and capacity of the uploaded  $\text{Al}(\text{BH}_4)_3(\text{NH}_3)_6$  can be readily tuned by adjusting the capacity of  $\text{NH}_3$  adsorbed during the 1<sup>st</sup> cycle.

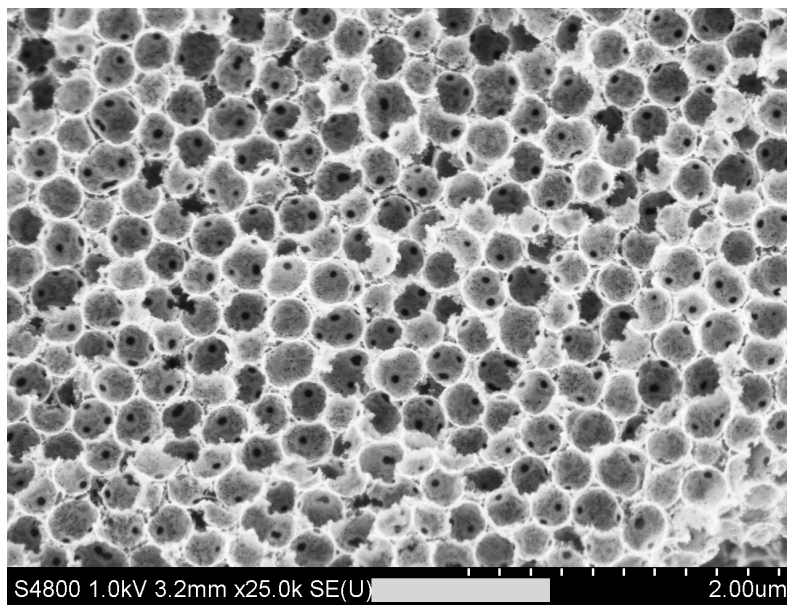

**Figure S6** SEM image of C-30

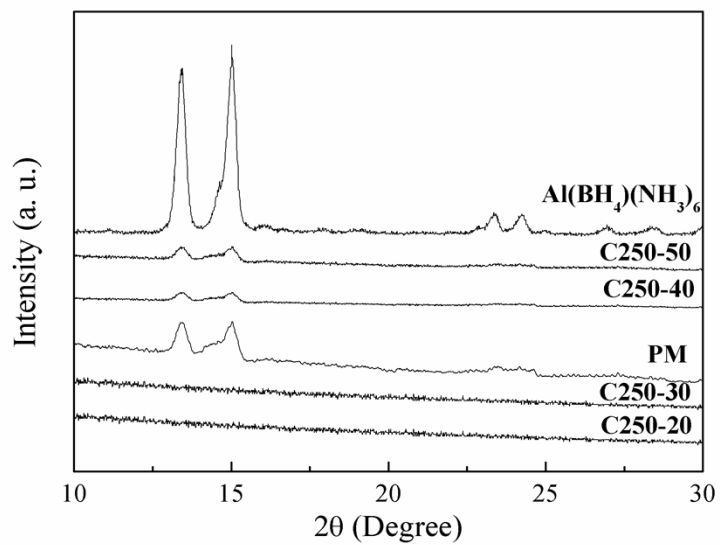

**Figure S7.** XRD patterns of a physical mixture of 30 wt.%  $\text{Al(BH}_4)_3(\text{NH}_3)_6$  with carbon (PM), and  $\text{Al(BH}_4)_3(\text{NH}_3)_6$  confined into carbon scaffold with various weight capacity, including bulk  $\text{Al(BH}_4)_3(\text{NH}_3)_6$  for reference.



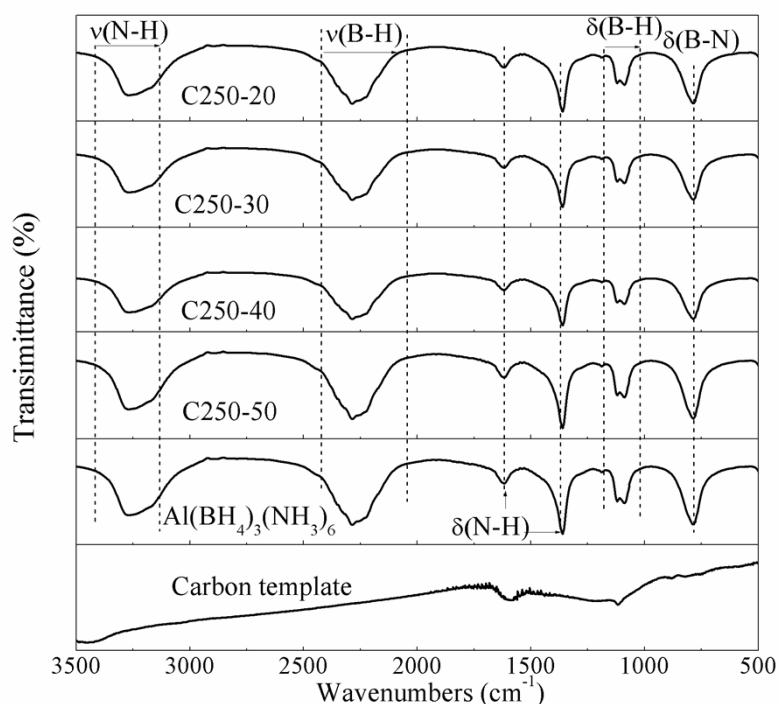

**Figure S8.** FT-IR spectra of  $\text{Al}(\text{BH}_4)_3(\text{NH}_3)_6$  confined into carbon scaffold with various weight capacity via CLD, including bulk  $\text{Al}(\text{BH}_4)_3(\text{NH}_3)_6$  and carbon templates for reference.

The presence of similar absorption peaks for N-H and B-H bonds of nanoconfined  $\text{Al}(\text{BH}_4)_3(\text{NH}_3)_6$  with bulk  $\text{Al}(\text{BH}_4)_3(\text{NH}_3)_6$  provides the further evidences for the formation of  $\text{BH}_4$  and  $\text{NH}_3$  moieties of  $\text{Al}(\text{BH}_4)_3(\text{NH}_3)_6$  inside the pores of carbon templates. Moreover, the B-N bonds at around  $780\text{ cm}^{-1}$  indicates the interaction of  $\text{BH}_4$  with  $\text{NH}_3$  groups within  $\text{Al}(\text{BH}_4)_3(\text{NH}_3)_6$ , in which the combination of B-H and N-H bonds mainly affords its  $\text{H}_2$  release.

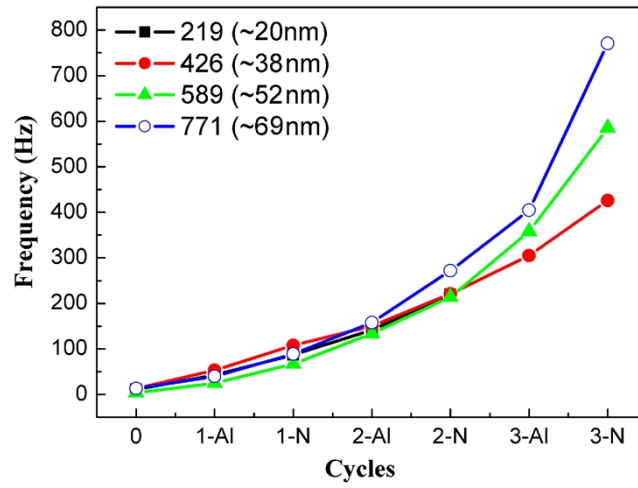

**Figure S9** Deposition of HAAB with various thickness on QC substrate.

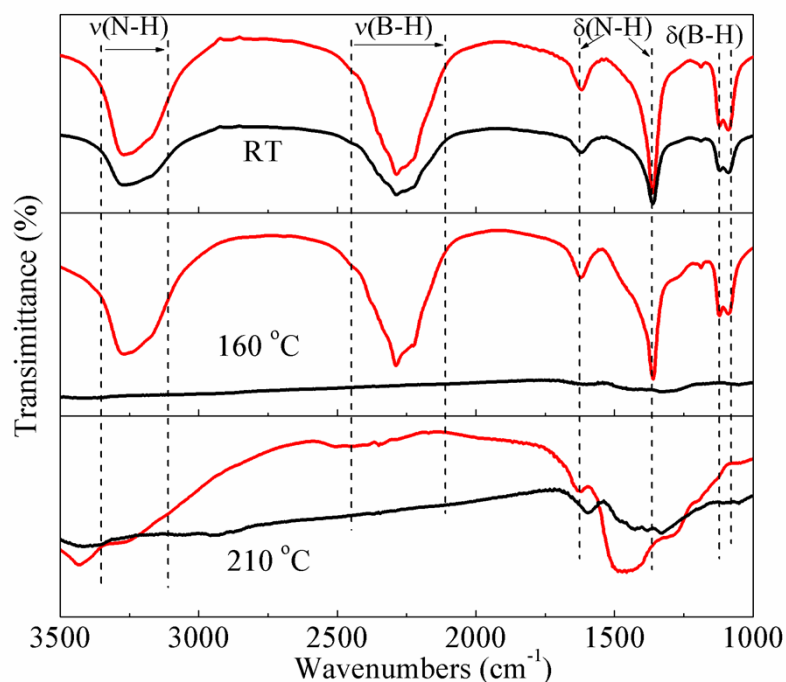

**Figure S10.** FTIR spectra for bulk (in red line) and nanoconfined (in black line)  $\text{Al}(\text{BH}_4)_3(\text{NH}_3)_6$  at room temperature (RT) and its products after heating to 160 °C and 210 °C, respectively. The heating rate is 5 °C/min.

The spectra of bulk and nanoconfined  $\text{Al}(\text{BH}_4)_3(\text{NH}_3)_6$  show the characteristic peaks of B-H and N-H bonds. Upon heating, the combination of  $\text{H}^\delta$  of  $\text{BH}_4$  with  $\text{H}^{\delta+}$  of  $\text{NH}_3$  mainly accounts for the  $\text{H}_2$  desorption from ammine metallic borohydrides. Therefore, after heating to 160 °C, B-H and N-H bonds disappeared for the nanoconfined  $\text{Al}(\text{BH}_4)_3(\text{NH}_3)_6$ , indicating the participation of  $\text{BH}_4$  groups and  $\text{NH}_3$  groups in the process towards  $\text{H}_2$  release, which amounts to over 95% of its total releasable  $\text{H}_2$  capacity as evinced from TG and TPD results. In contrast, for the bulk  $\text{Al}(\text{BH}_4)_3(\text{NH}_3)_6$  heated to 160 °C, there are clear peaks attributed to the B-H and N-H bonds, suggesting only partial decomposition for a small amount of  $\text{H}_2$  and  $\text{NH}_3$  release, which accords well to the TG and TPD results. Upon further elevating the heating temperature to 210 °C, all the absorption bands of bulk  $\text{Al}(\text{BH}_4)_3(\text{NH}_3)_6$  assigned to the  $\text{NH}_3$  group and the  $\text{BH}_4^{-1}$  ion disappeared, due to the combination of N-H bonds and B-H bonds for  $\text{H}_2$  desorption. These results indicate the significantly improved  $\text{H}_2$  release kinetics at relatively lower temperature of  $\text{Al}(\text{BH}_4)_3(\text{NH}_3)_6$  space-confined into carbon scaffolds via the CLD methodology.

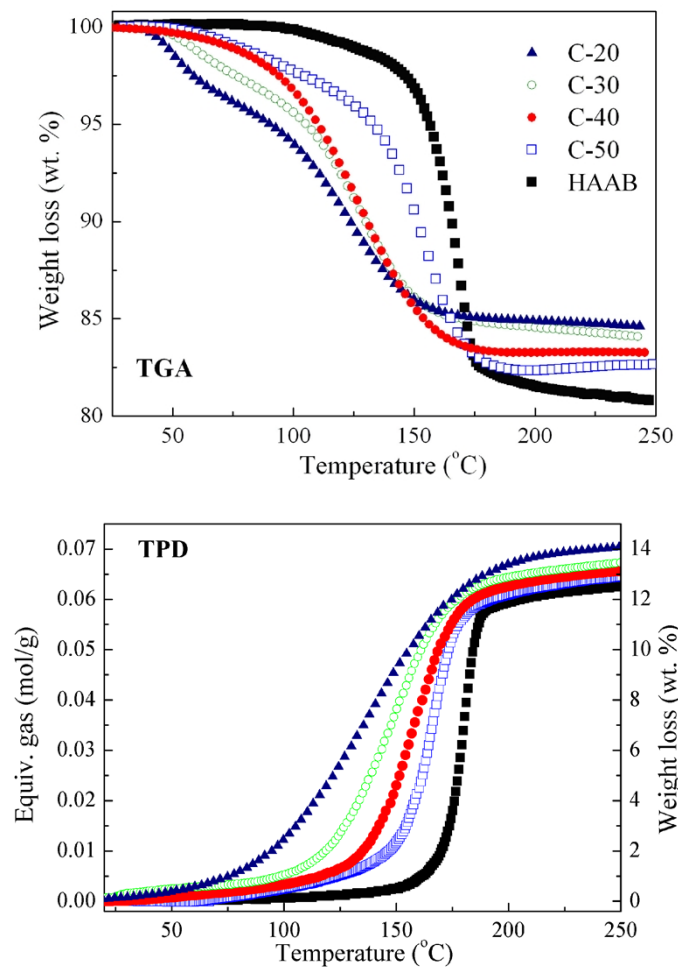

**Figure S11.** TGA and TPD profiles of  $\text{Al}(\text{BH}_4)_3(\text{NH}_3)_6$  confined into scaffolds upon heating to 250 °C using a heating rate of 5 °C/min, including bulk  $\text{Al}(\text{BH}_4)_3(\text{NH}_3)_6$  (HAAB) for comparison.

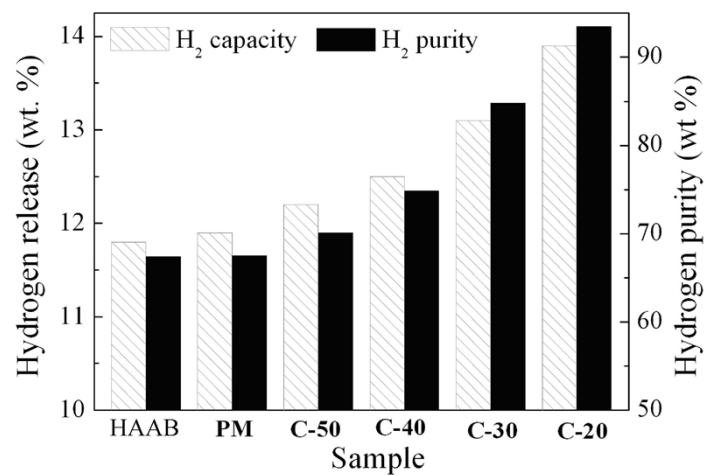

**Figure S12** Histogram of capacity and purity of hydrogen evolution from HAAB, physical mixture of HAAB and carbon scaffold (PM), and HAAB@HOPC (C-20, C-30, C-40, C-50) by 250 °C.

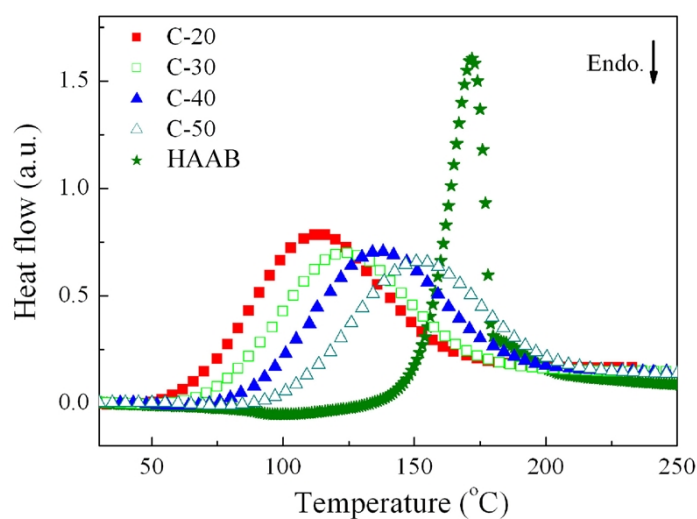

**Figure S13.** DSC profiles of HAAB and HAAB@HOPC (C-20, C-30, C-40, C-50) upon heating to 250 °C using a heating rate of 5 °C/min.

The as-prepared  $\text{Al}(\text{BH}_4)_3(\text{NH}_3)_6$  exhibits a single exothermic peak at 172 °C with a shoulder, corresponding to an enthalpy of approximately -6.75 KJ/mol  $\text{H}_2$ . Comparable traces upon hydrogen liberation were observed for  $\text{Al}(\text{BH}_4)_3(\text{NH}_3)_6$  nanoconfined into scaffolds at relatively lower temperature, with one exothermic signal significantly broadened in comparison with bulk reagent in good accordance with the MS results. However, the integration of the endothermic peaks (Table S1) indicates that the total enthalpy of the reaction increases slowly with the decreasing capacity of  $\text{Al}(\text{BH}_4)_3(\text{NH}_3)_6$  inside the carbon matrix, which is consistent with the diminution of ammonia released upon dehydrogenation due to the fact that ammonia release is significantly endothermic from borohydrides. The similar phenomenon was also found for the hydrogen release process of ammonia borane (AB) infiltrated into the mesopores of SBA-15. It suggests that different solid products formed for  $\text{Al}(\text{BH}_4)_3(\text{NH}_3)_6$  inside the carbon scaffolds derived from more ammonia participate in hydrogen release compared with the pure one resulting in the more exothermicity for dehydrogenation. Moreover, compared to decomposition of the other typical hydrogen storage materials based on HB-NH combination, e.g., neat AB (-21 KJ/mol  $\text{H}_2$ ), the significantly less exothermic characterization of nanoconfined  $\text{Al}(\text{BH}_4)_3(\text{NH}_3)_6$  provides a great potential for its reversible hydrogen storage with proper chemical modification. Therefore, the tremendous enhancement of hydrogen desorption performance at low temperature not only relates to the improved dehydrogenation kinetics but also the more favorable thermodynamics to some extent, compared to bulk counterparts, due to the reduction of particle sizes induced by the nanoconfinement procedure.

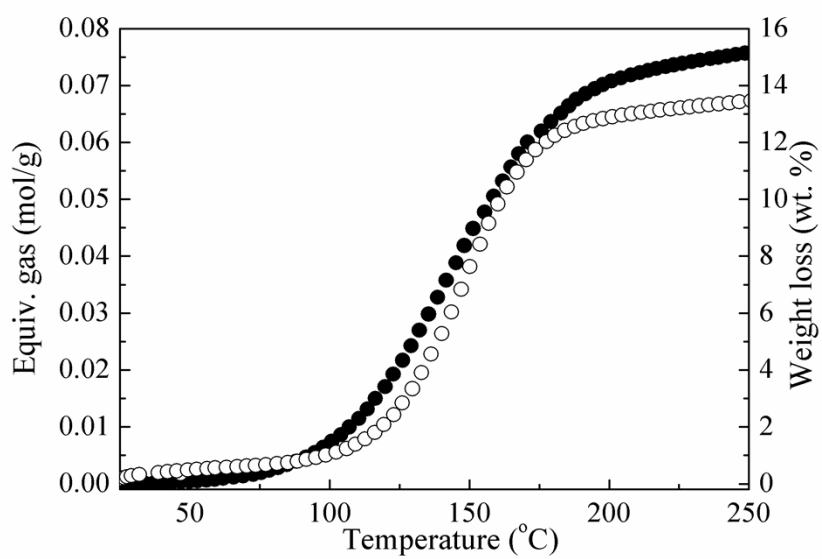

**Figure S14.** TPD results of C-30 and Al(BH<sub>4</sub>)<sub>3</sub>(NH<sub>3</sub>)<sub>5</sub>@HOPC (●) upon heating to 250 °C using a heating rate of 5 °C/min.

**Table S1.** The peak temperature and Enthalpy data for hydrogen release from  $\text{Al}(\text{BH}_4)_3(\text{NH}_3)_6$  loaded in carbon scaffolds, the data of bulk  $\text{Al}(\text{BH}_4)_3(\text{NH}_3)_6$  were also listed for comparison.

| Sample                                    | Peak Temperature (°C) | Enthalpy ( KJ/mol H <sub>2</sub> ) |
|-------------------------------------------|-----------------------|------------------------------------|
| C-20                                      | 112.5                 | -7.23                              |
| C-30                                      | 122.9                 | -6.81                              |
| C-40                                      | 135.8                 | -6.79                              |
| C-50                                      | 150.8                 | -6.78                              |
| $\text{Al}(\text{BH}_4)_3(\text{NH}_3)_6$ | 172.1                 | -6.75                              |
